# Supplementary material for: α-Fe2O3 hollow structures: formation of single crystalline thin shells
Source: Royal Society of Chemistry journal article supplement (doi:10.1039/c2cc33032f), 2012-01-01
Supplement: c2cc33032f.pdf [file c2cc33032f.pdf]

## Electronic supplementary Information

### **$\alpha$ -Fe<sub>2</sub>O<sub>3</sub> hollow structures: formation of single crystalline thin shells**

**Bing Xu,<sup>a</sup> Baibiao Huang,<sup>\*a</sup> Hefeng Cheng,<sup>a</sup> Zeyan Wang,<sup>a</sup> Xiaoyan Qin,<sup>a</sup>  
Xiaoyang Zhang<sup>a</sup> and Ying Dai<sup>b</sup>**

<sup>a</sup> State Key Laboratory of Crystal Materials, Shandong University, Jinan 250100, P. R. China, Email: bbhuang@sdu.edu.cn, Fax: (+86) 531-8836-5969.

<sup>b</sup> School of Physics, Shandong University, Jinan 250100, P. R. China

## Experimental Section

**Preparation of  $\alpha$ -Fe<sub>2</sub>O<sub>3</sub> hollow polyhedron:** In the experiment, all the reagents were analytical grade and were used without further purification. The  $\alpha$ -Fe<sub>2</sub>O<sub>3</sub> hollow polyhedron structures were synthesized by a facile hydrothermal approach. In a typical synthesis, 3 mmol of FeCl<sub>3</sub>·6H<sub>2</sub>O was dissolved in 80 ml of ultra-pure water, followed by addition of 0.1 ml of C<sub>4</sub>MimBF<sub>4</sub> (1-Butyl-3-methylimidazolium tetrafluoroborate) to form a clear solution at room temperature. After stirring for three hours, the solution was transferred into a 100 ml Teflon-lined stainless steel autoclave, maintained at 200 °C for 2.0, 2.75, 7.0, 15.0 hours, respectively. After the reaction, the precipitates were washed with distilled water and ethanol several times and then dried at 60 °C for 6 h in air.

**Characterization:** XRD measurements were carried out on a Bruker D8-Avance X-ray powder diffractometer with a Cu-K $\alpha$  X-ray tube ( $\lambda = 0.154056$  nm, the accelerating voltage and the applied current were 40 kV and 35 mA). The morphologies of the samples were observed by SEM (Hitachi S-4800 microscope, acceleration voltage = 7 kV, working distance = 4 mm). The TEM images and SAED patterns were performed by a JEOL JEM-2100 instrument. UV/vis diffuse reflectance spectra (DRS) were recorded on a Shi-madzu UV2550 recording spectrophotometer equipped with an integrating sphere from 300 to 700 nm with a step size of 0.5 nm. BaSO<sub>4</sub> was used as a reference. The Brunauer-Emmett-Teller method with a Builder 4200 instrument at liquid nitrogen temperature was used to measure the surface area.

**Photodegradation evaluation:** The photodegradation activity of the as-prepared samples was characterized by the degradation of rhodamine B (RhB) under visible light irradiation in the presence of H<sub>2</sub>O<sub>2</sub> at the room temperature. In a typical procedure, 0.05 g catalyst was suspended in 60 ml of RhB (20 mg/L) aqueous solution, followed by addition of 1 mL of H<sub>2</sub>O<sub>2</sub> (30 wt%). Before irradiation, the suspensions were stirred in dark for 1 h to reach an adsorption/desorption equilibrium. The visible light was provided by a 300 W Xe arc lamp equipped with UV cutoff filter. The concentration of RhB dye was determined by a UV/Vis spectrophotometer (Xinmao UV-7502PC, Shanghai).

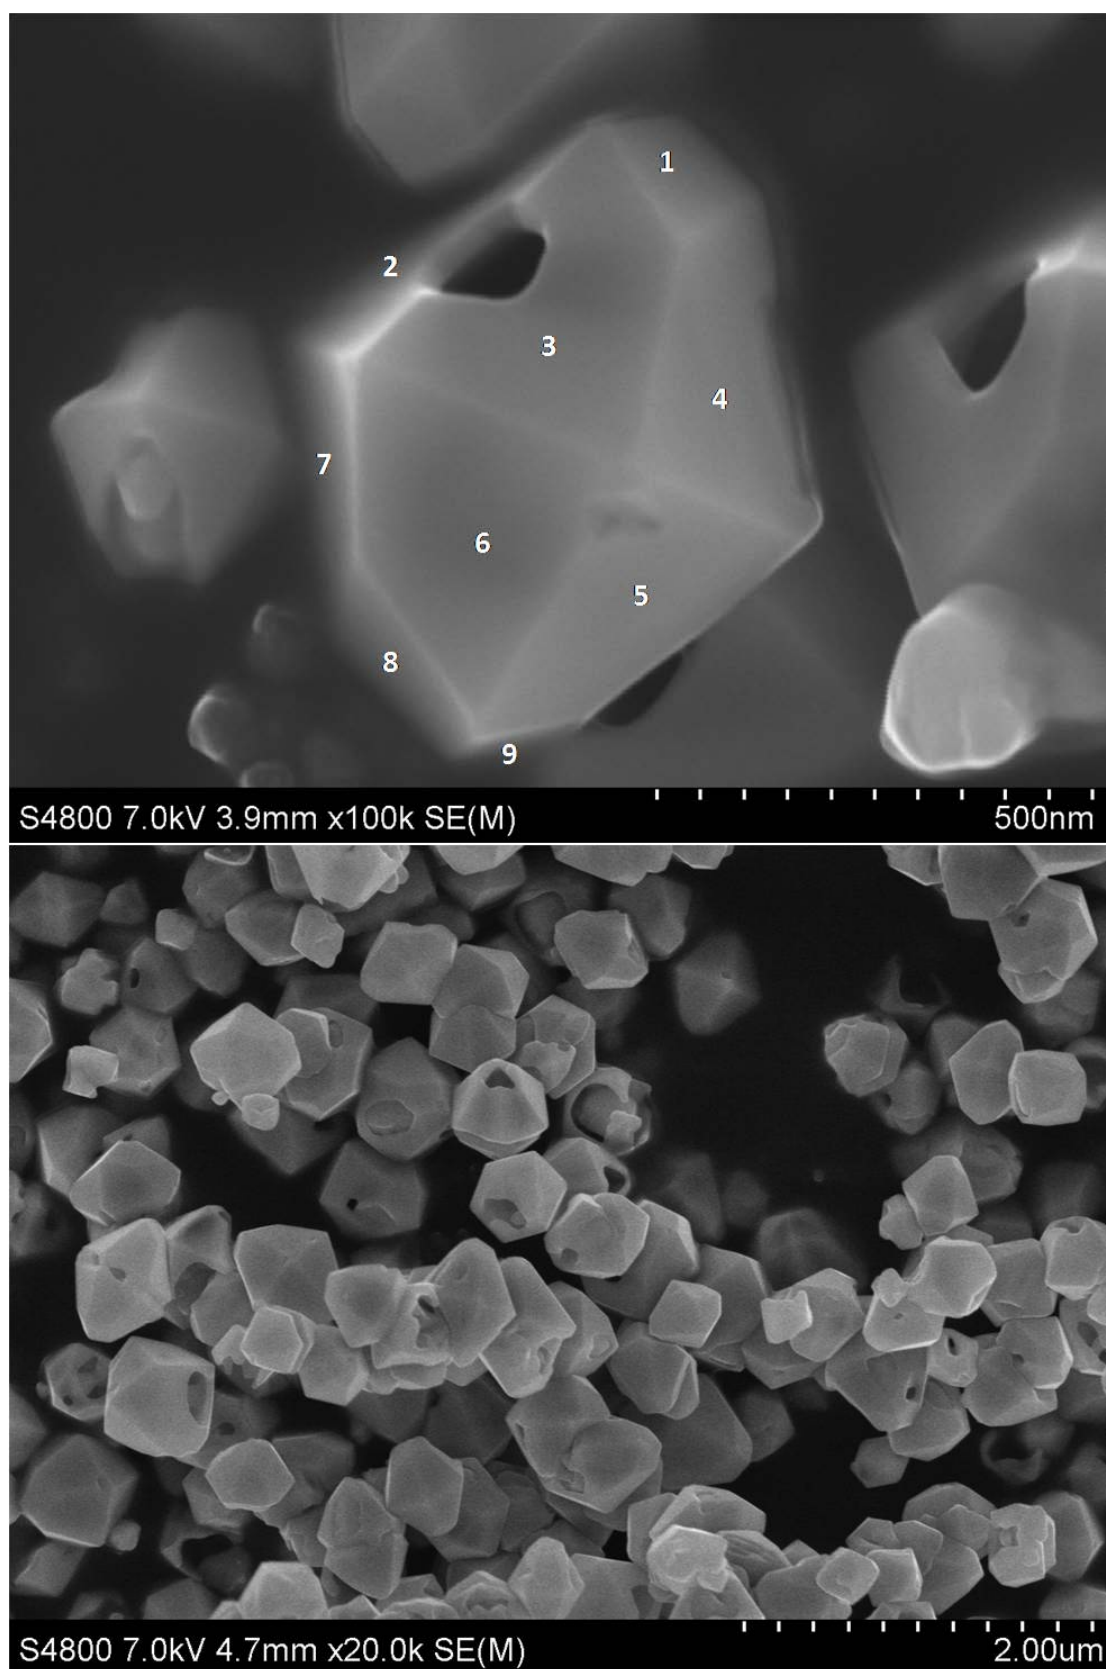

**Fig. S1** SEM images of hollow polyhedrons

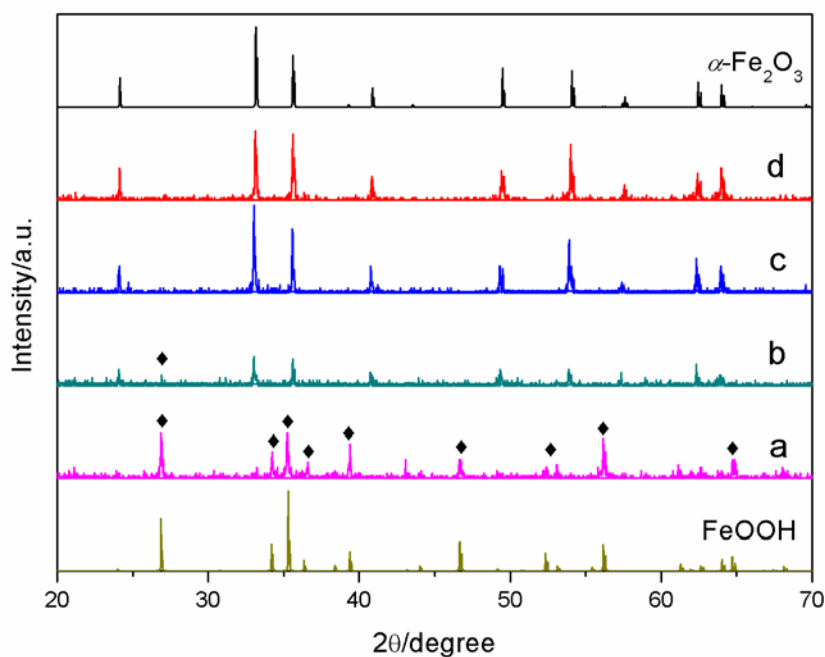

**Fig. 2S** XRD patterns of the samples prepared for different hydrothermal times: (a) 2, (b) 2.75, (c) 7, (d) 15 h. For comparison, the XRD patterns of FeOOH and  $\alpha\text{-Fe}_2\text{O}_3$  are also shown. Symbol:  $\blacklozenge$  = FeOOH.

Fig. 2S shows the powder X-ray diffraction (XRD) patterns of the as-prepared samples which were synthesized at 200 °C for different hydrothermal times. From this figure, we can find that the sample prepared under 2 h reaction time are tetragonal FeOOH (space group: I4/m;  $a=10.480$ ,  $c=3.023$  Å, JCPDS No. 75-1594). As the reaction time increased to 2.75 h, FeOOH gradually transformed to  $\alpha\text{-Fe}_2\text{O}_3$  (space group: R-3c;  $a=5.0356$ ,  $c=13.7489$  Å, JCPDS No. 33-664), and only small amount of FeOOH remained. The weak intensity of the  $\alpha\text{-Fe}_2\text{O}_3$  indicates that the sample is poor crystallinity which could be ascribed to the short reaction time. When the reaction time increased further, pure phase of  $\alpha\text{-Fe}_2\text{O}_3$  can be obtained with improved crystallinity.

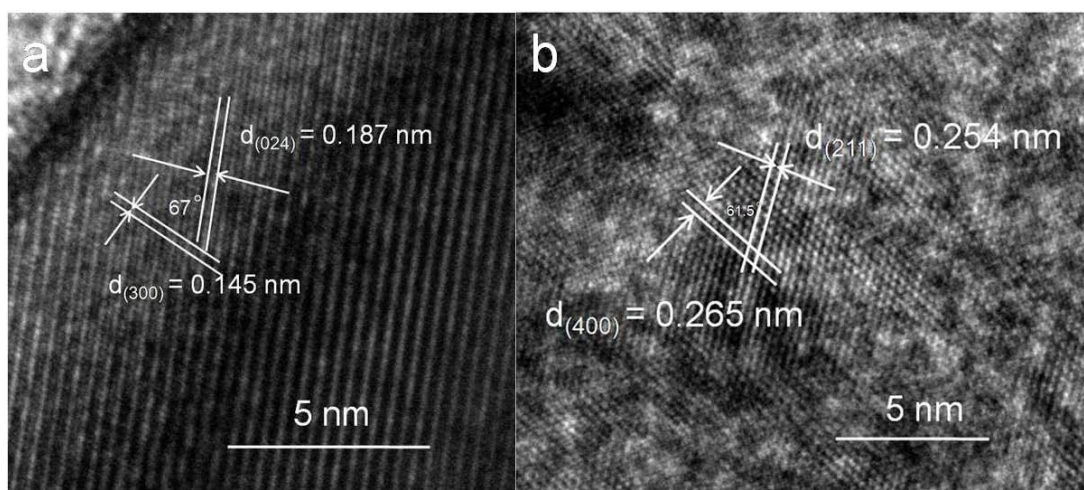

**Fig. S3** HRTEM images of (a) near-spherical solid particle, (b) debris.

As shown in Fig. S3a, the lattice spacings of 0.145 nm and 0.187 nm correspond to the (300) and (024) plane of the  $\alpha\text{-Fe}_2\text{O}_3$ , respectively. According to the crystal system of  $\alpha\text{-Fe}_2\text{O}_3$  and its lattice constants, the angle between (300) plane and (024) plane was calculated to be  $65^\circ$ , which nearly matched the measured angle  $67^\circ$ . In Fig. S3b, the lattice spacings of 0.265 nm and 0.254 nm correspond to the (400) and (211) plane of the FeOOH, respectively. According to the crystal system of FeOOH and its lattice constants, the angle between (400) plane and (211) plane was calculated to be  $61^\circ$ , which nearly matched the measured angle  $61.5^\circ$ . Thus, the near-spherical solid particles can be identified as  $\alpha\text{-Fe}_2\text{O}_3$  and the debris are confirmed to FeOOH.

## Influence of different ions on $\alpha$ -Fe<sub>2</sub>O<sub>3</sub> morphology

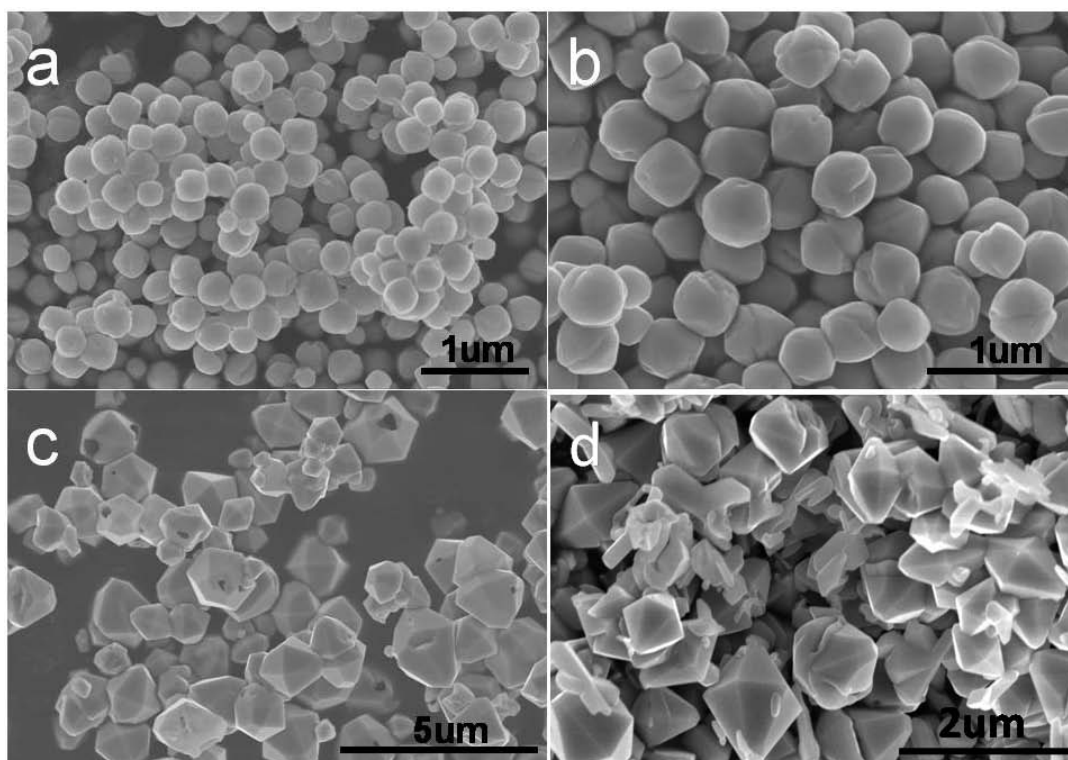

**Fig. S4** SEM images of samples prepared with different additives: (a) blank, (b) C<sub>4</sub>MimCl, (c) NaBF<sub>4</sub>, (d) NaF.

As shown in Fig. S4a, the blank sample prepared without any additive exhibits near-spherical shape with particle sizes about 200-450 nm. When C<sub>4</sub>MimCl was added during the synthetic procedure, similar morphology, namely near-spherical, can be observed as shown in Fig. S4b. However, the sizes of the  $\alpha$ -Fe<sub>2</sub>O<sub>3</sub> particles are much larger (about 450 nm), and the uniformity is also improved. Some cracks can also be observed on the surfaces of the sample, which may be due to the suppressed hydrolysis of ferric ion in presence of C<sub>4</sub>Mim<sup>+</sup> leading to slower nucleation rates. And the slower nucleation rate also results in larger particle sizes. Fig. S4c shows the samples synthesized with NaBF<sub>4</sub> as additive. The hollow polyhedron structures also can be obtained even without C<sub>4</sub>Mim<sup>+</sup>, but the polyhedrons are not uniform. As shown in Fig. S4d, the sample was synthesized with NaF as additive. The polyhedron structures can be obtained, but they are not hollow structures.

## The photodegradation mechanism

Under visible light irradiation, photogenerated carriers are formed in  $\alpha$ -Fe<sub>2</sub>O<sub>3</sub> hollow polyhedrons. The holes migrate to surface and oxidize RhB dye. As previously reported<sup>1</sup>, the electrons may be consumed by the following ways. They are trapped by H<sub>2</sub>O<sub>2</sub> to form OH radicals, which can degrade RhB dyes efficiently. Or the electrons are trapped by Fe<sup>3+</sup> to form Fe<sup>2+</sup>. The Fe<sup>2+</sup>/H<sub>2</sub>O<sub>2</sub> is the famous Fenton's reagent<sup>2</sup> and the Fenton reaction is an effective method to oxidize contaminants.

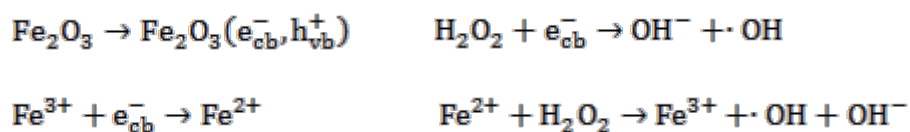

### Reference

- 1 J. G. Yu, X. X. Yu, B. B. Huang, X. Y. Zhang and Y. Dai, *Cryst. Growth Des.*, 2009, 9, 1474.
- 2 H. J. H. Fenton, *J. Chem. Soc., Trans.*, 1894, 65, 899.
